# The Anesthesiologist's Bookshelf

*Edited by HUBERTA M. LIVINGSTONE, M.D.*

**Respiration in Health and Disease.** By R. M. CHERNIACK, M.D., M.Sc., F.R.C.P. (C), Assistant Professor of Medicine, University of Manitoba School of Medicine; Director, Respiratory Division, Clinical Investigation Unit, and Assistant Physician, Winnipeg General Hospital; Consultant in Respiratory Diseases to Children's Hospital and Municipal Hospital, AND L. CHERNIACK, M.D., B.Sc., M.R.C.P. (LOND.) F.R.C.P. (C), F.A.C.P., Assistant Professor of Medicine, University of Manitoba School of Medicine; Associate Physician, Winnipeg General Hospital; Physician, Division of Medicine, Winnipeg Clinic, Winnipeg, Canada. Illustrated by Nancy Joy, A.O.C.A., Assistant Professor of Medical Illustration, University of Manitoba School of Medicine, Winnipeg, Canada. Cloth. \$10.00. Pp. 403, with 92 figures and 8 tables. W. B. Saunders Co., Philadelphia, London, 1961.

The avowed purpose of this book is to elucidate the mechanisms by which symptoms and abnormal signs are produced in various patterns of respiratory disease and thus bridge the gap between technical treatises on pulmonary physiology and purely descriptive textbooks on respiratory diseases. The authors have achieved a modicum of success in filling this large order.

The volume is divided into four sections. The first section considers such basic physiological aspects of respiration as mechanics of breathing, gaseous exchange, respiratory functions of blood, and regulation of respiration. The second section describes symptoms and signs of respiratory disease. The third section analyzes patterns of respiratory diseases, diseases of the chest wall and thoracic cage, and cardiorespiratory insufficiency. The final section covers clinical, radiological, clinical-pathological and functional assessments of respira-

tory disease. A detailed bibliography has been omitted, but a list of suggested additional reading is included.

This good introduction to physiology and pathophysiology of respiration in relation to respiratory diseases is clearly written and readable. Diagrams and line drawings are superbly done, and add remarkable clarity to explanations and descriptions in the text. Unfortunately this book appeared at almost the same time as the first English edition of the German classic, "Respiration: Physiologic Principles and Their Clinical Application," by Rossier, Bühlman, and Wiesinger, which serious students of respiration will find covers much of the same ground in considerably more-detailed and authoritative fashion.

DAVID M. LITTLE, JR., M.D.

**Comparative Animal Physiology.** SECOND EDITION. By C. LADD PROSSER, PH.D., Professor of Physiology, University of Illinois, and FRANK A. BROWN, JR., PH.D., Professor of Biology, Northwestern University. Cloth. \$13.50. Pp. 688, with 278 figures. W. B. Saunders Co., Philadelphia, London, 1961.

This is a very excellent text of Comparative Animal Physiology, exactly as its title states! As such it is superb in subject matter, illustrations and bibliography. The chapter topics such as: Water: Osmotic Balance; Inorganic Ions; Nutrition; Oxygen: Respiration and Metabolism; Respiratory Functions of Body Fluids; and others, through 21 sections, survey the entire animal kingdom. The authors note that the aim of the book is to serve as a text at the upper class undergraduate level or beginning graduate level, or as a reference book for principal topics in certain physiological fields. The latter function would be the chief use for anesthesiologists. The chapters on Oxygen, Muscle and Electric Organs and
